# Supplementary material for: Macroalgae-based biochar: preparation and characterization of physicochemical properties for potential applications
Source: Royal Society of Chemistry journal article supplement (doi:10.1039/d4su00008k), 2024-01-01
Supplement: d4su00008k1.pdf [file d4su00008k1.pdf]

## Supplementary Information

# Macroalgae-based biochar: preparation and characterization of physicochemical properties for potential applications

Anjon Kumar Mondal<sup>a</sup>, Cora Hinkley<sup>a</sup>, Lakshmi Krishnan<sup>a</sup>, Nandhini Ravi<sup>a</sup>, Farjana Akter<sup>a</sup>, Peter Ralph<sup>a</sup>, Unnikrishnan Kuzhiumparambil<sup>a</sup> \*

<sup>a</sup>Climate Change Cluster, University of Technology Sydney, Ultimo, NSW 2007, Australia

### S1 Calculation of biochar, bio-oil and gas obtained from five macroalgal biomasses.

The biochar, bio-oil and gas yield were calculated using the following equations: <sup>1</sup>

$$\text{Yield of biochar } (Y_{\text{biochar}}) = M_c/M_f \times 100 \quad (1)$$

Where, Y = Yield of biochar (%),  $M_c$  = Mass of biochar (g),  $M_f$  = Mass of biomass (g).

$$\text{Yield of bio-oil } (Y_{\text{bio-oil}}) = M_{\text{bio-oil}}/M_f \times 100 \quad (2)$$

Where, Y = Yield of bio-oil (%),  $M_{\text{bio-oil}}$  = Mass of bio-oil (g),  $M_f$  = Mass of biomass (g).

The weight difference was used to calculate the yield percentage of gas by subtracting the mass of biomass with the mass of biochar and bio-oil. Subsequently, the yield of gases was estimated using the mass of gases obtained.

$$M_g = M_f - (M_c + M_{\text{bio-oil}}) \quad (3)$$

$M_g$  = Mass of gas (g)

$$Y_g = M_g/M_f \times 100 \quad (4)$$

Where,  $Y_g$  = Yield of gas (biogas + syngas) (%).

**Table S2**

| Name        | <i>Ulva</i><br><i>Sp.</i> | <i>Asparagopsis</i> | <i>Oedogonium</i><br><i>Sp.</i> | <i>Kappaphycus</i><br><i>alvarezii</i> | <i>Eucheuma</i><br><i>denticulatum</i> |
|-------------|---------------------------|---------------------|---------------------------------|----------------------------------------|----------------------------------------|
| Biochar (%) | 30.46                     | 40.00               | 28.20                           | 41.59                                  | 46.96                                  |
| Bio-oil (%) | 6.37                      | 7.04                | 9.06                            | 8.95                                   | 6.87                                   |
| Gas (%)     | 63.17                     | 52.96               | 62.74                           | 49.46                                  | 46.17                                  |

**Table S3 Comparison of biochar properties obtained from 5 macroalgal biomasses and biochar from other feedstocks.**

| Parameters                   | Yield (%) | Ash (%) | Volatile matter (%) | pH    | FC    | C     | N    | Reference     |
|------------------------------|-----------|---------|---------------------|-------|-------|-------|------|---------------|
| Wheat straw                  | -         | 20.8    |                     | 10.4  |       | 46.70 | 0.59 | <sup>2</sup>  |
| Wood                         | 23.3      | 1.30    | 6.40                | 9.10  | 93.6  | 92.3  | -    | <sup>3</sup>  |
| Straw                        | 25.2      | 24.5    | 7.40                | 11.3  | 92.6  | 90.3  | -    | <sup>3</sup>  |
| Green waste                  | 24.4      | 13.40   | 8.80                | 11.3  | 91.2  | 88.4  |      | <sup>3</sup>  |
| Conocarpus wastes            | -         | 8.56    | 27.22               | 12.2  | -     | 82.90 | 0.71 | <sup>4</sup>  |
| Peanut shell                 | 21.9      | 8.9     | 32.7                | 10.6  | -     | 83.8  | -    | <sup>5</sup>  |
| Safflower seed               | -         | 9.20    | 11.6                | 9.89  | -     | 73.72 | 3.84 | <sup>6</sup>  |
| Forest residues              | -         | -       | 24                  | 8.70  | -     | 75.9  | 0.45 | <sup>7</sup>  |
| Pig manure                   | -         | 51.20   | 22.6                |       | -     | 33.8  | 3.18 | <sup>8</sup>  |
| Chicken Manure               | 55.9      | 56.4    | 26.5                | 11.7  | -     | 24.7  | -    | <sup>9</sup>  |
| Dairy manure                 |           | 39.5    | 27.7                | 9.9   | -     | 56.7  | -    | <sup>10</sup> |
| Cow manure                   |           | -       | -                   | 9.2   | -     | 33.6  | 1.51 | <sup>11</sup> |
| Oil mallee                   |           | 15.6    | 4.10                | -     | -     | 80.1  | 0.30 | <sup>12</sup> |
| Wood Ponderosa pine          | -         | 2.1     | 25.2                | -     | -     | 81.9  | 0.08 | <sup>13</sup> |
| Coffee husk                  | 31.6      | 19.6    | 17.6                | 9.9   | -     | 66.0  | -    | <sup>9</sup>  |
| Mulberry wood                | 26.2      | 9.8     | -                   | 10.6  | -     | 77.0  | -    | <sup>14</sup> |
| Corn stover                  | 17.0      | 32.8    | -                   | 7.2   | -     | 57.3  | -    | <sup>15</sup> |
| <i>Ulva Sp.</i>              | 30.46     | 31.1    | 22.87               | 10.53 | 42.41 | 55.77 | 3.78 | Current work  |
| <i>Asparagopsis</i>          | 40.0      | 30.86   | 34.21               | 9.74  | 32.5  | 51.89 | 4.97 | Current work  |
| <i>Oedogonium Sp.</i>        | 28.2      | 12.6    | 14.57               | 10.95 | 68.86 | 70.23 | 7.91 | Current work  |
| <i>Kappaphycus alvarezii</i> | 41.59     | 41.73   | 31.34               | 10.42 | 24.94 | 52.23 | 0.99 | Current work  |
| <i>Eucheuma denticulatum</i> | 46.96     | 52.12   | 43.92               | 9.86  | 2.63  | 40.12 | 1.50 | Current work  |

**Table S4 Adsorption efficiency and adsorption capacity of five macroalgal biochar samples.**

| <b>Adsorption</b>          | <b><i>Ulva</i><br/>Sp.</b> | <b><i>Asparagopsis</i></b> | <b><i>Oedogonium</i><br/>Sp.</b> | <b><i>Kappaphycus</i><br/><i>alvarezii</i></b> | <b><i>Eucheuma</i><br/><i>denticulatum</i></b> |
|----------------------------|----------------------------|----------------------------|----------------------------------|------------------------------------------------|------------------------------------------------|
| Adsorption efficiency (%)  | 100.00                     | 98.10                      | 96.78                            | 98.09                                          | 95.47                                          |
| Adsorption capacity (mg/g) | 0.5                        | 0.24                       | 0.10                             | 0.05                                           | 0.008                                          |

## References

1. W. Z. W. Muhammad, M. R. Isa, S. H. Habib, C. C. Seah, R. Hafriz and A. H. Shamsuddin, *Energy Conversion and Management: X*, 2023, **20**, 100481.
2. A. Zhang, L. Cui, G. Pan, L. Li, Q. Hussain, X. Zhang, J. Zheng and D. Crowley, *Agriculture, ecosystems & environment*, 2010, **139**, 469-475.
3. F. Ronsse, S. Van Hecke, D. Dickinson and W. Prins, *Gcb Bioenergy*, 2013, **5**, 104-115.
4. M. I. Al-Wabel, A. Al-Omran, A. H. El-Naggar, M. Nadeem and A. R. A. Usman, *Bioresource technology*, 2013, **131**, 374-379.
5. M. Ahmad, S. S. Lee, X. Dou, D. Mohan, J.-K. Sung, J. E. Yang and Y. S. Ok, *Bioresource technology*, 2012, **118**, 536-544.
6. D. Angin, *Bioresource technology*, 2013, **128**, 593-597.
7. N. Anderson, J. G. Jones, D. Page-Dumroese, D. McCollum, S. Baker, D. Loeffler and W. Chung, *Energies*, 2013, **6**, 164-183.
8. S. M. Troy, T. Nolan, J. J. Leahy, P. G. Lawlor, M. G. Healy and W. Kwapinski, *Biomass and Bioenergy*, 2013, **49**, 1-9.
9. R. R. Domingues, P. F. Trugilho, C. A. Silva, I. C. N. A. d. Melo, L. C. A. Melo, Z. M. Magriotis and M. A. Sanchez-Monedero, *PloS one*, 2017, **12**, e0176884.
10. K. B. Cantrell, P. G. Hunt, M. Uchimiya, J. M. Novak and K. S. Ro, *Bioresource technology*, 2012, **107**, 419-428.
11. K. C. Uzoma, M. Inoue, H. Andry, H. Fujimaki, A. Zahoor and E. Nishihara, *Soil use and management*, 2011, **27**, 205-212.
12. P. Shivaram, Y.-K. Leong, H. Yang and D. K. Zhang, *Fuel*, 2013, **104**, 326-332.
13. K. Marco, S. N. Peter, G. J. Mark and K. Markus, *Environmental Science & Technology*, 2010, **44**, 1247-1253.
14. E. F. Zama, Y.-G. Zhu, B. J. Reid and G.-X. Sun, *Journal of cleaner production*, 2017, **148**, 127-136.
15. C. A. Mullen, A. A. Boateng, N. M. Goldberg, I. M. Lima, D. A. Laird and K. B. Hicks, *Biomass and bioenergy*, 2010, **34**, 67-74.
